# Supplementary material
Source: publisher figshare collection journal article supplement (https://frontiersin.figshare.com/ndownloader/files/27597299)
Supplement: Supplementary file [file 27597299]

Supplementary Table S4. Expression experiments considered in this study.

| Condition                                  | Experiment   | Original strain | Number of upregulated or essential genes | Reference |
|--------------------------------------------|--------------|-----------------|------------------------------------------|-----------|
| Bacteremia                                 | RNA-Seq      | ATCC 17978      | 557                                      | [1]       |
| Bloodstream infection (required)           | Tn-insertion | ATCC 17978      | 59                                       | [2]       |
| BALF                                       | Proteomics   | AbH12O-A2       | 50                                       | [3]       |
| Biofilm vs exponential planktonic cells    | RNA-Seq      | ATCC 17978      | 35                                       | [4]       |
| Biofilm vs stationary planktonic cells     | RNA-Seq      | ATCC 17978      | 116                                      | [4]       |
| Hydrogen peroxide                          | RNA-Seq      | ATCC 17978      | 155                                      | [5]       |
| Iron limitation                            | Microarray   | ATCC 17978      | 463                                      | [6]       |
| Macrophage infection                       | Proteomics   | AbH12O-A2       | 76                                       | [3]       |
| Mucin 0.5%                                 | RNA-Seq      | ATCC 19606      | 232                                      | [7]       |
| Pneumonia (required)                       | Tn-insertion | ATCC 17978      | 157                                      | [8]       |
| Rich medium (required)                     | Tn-insertion | ATCC 17978      | 453                                      | [8]       |
| Stationary vs exponential planktonic cells | RNA-Seq      | ATCC 17978      | 130                                      | [4]       |

## References

1. Murray *et al.* Global Gene Expression Profile of *Acinetobacter baumannii* During Bacteremia. *J Infect Dis.* (2017) 215:S52-S57.
2. Subashchandrabose *et al.* *Acinetobacter baumannii* Genes Required for Bacterial Survival during Bloodstream Infection. *mSphere.* (2015) 1: e00013-15.
3. Mendez *et al.* Quantitative proteomic analysis of host--pathogen interactions: a study of *Acinetobacter baumannii* responses to host airways. *BMC Genomics* (2015) 16:422.

4. Rumbo-Feal *et al.* Whole transcriptome analysis of *Acinetobacter baumannii* assessed by RNA-sequencing reveals different mRNA expression profiles in biofilm compared to planktonic cells. *PLoS One*. (2013) 8:e72968.
5. Juttukonda *et al.* *Acinetobacter baumannii* OxyR Regulates the Transcriptional Response to Hydrogen Peroxide. *Infect Immun*. (2018) 87:e00413-18.
6. Eijkelkamp *et al.* Investigation of the human pathogen *Acinetobacter baumannii* under iron limiting conditions. *BMC Genomics*. (2011) 12:126.
7. Ohneck *et al.* Mucin acts as a nutrient source and a signal for the differential expression of genes coding for cellular processes and virulence factors in *Acinetobacter baumannii*. *PLoS One*. (2018) 13: e0190599.
8. Wang *et al.* Genome-wide identification of *Acinetobacter baumannii* genes necessary for persistence in the lung. *mBio*. (2014) 5:e01163-14.
